# Supplementary material
Source: publisher figshare collection journal article supplement (https://rs.figshare.com/ndownloader/files/19167386)
Supplement: Supplementary file 1 [file 19167386]

## Sheet: Sheet3
Links to Experimental Videos
Date (dd/mm/yy)	Day of EXP	Link
2019-02-06	Day 1	https://data.mendeley.com/datasets/dscfvxsv6t/draft?a=fb0a3915-c47d-4336-80a9-375dd2032a4d
2019-02-08	Day 2	https://data.mendeley.com/datasets/5ncd9cmgb4/draft?a=9ec87c7e-29bf-4af1-9797-79c2ff7444a2
2019-02-11	Day 3	https://data.mendeley.com/datasets/d8262tx637/draft?a=42a887ab-a42a-4421-9a69-05c46829dd7a
2019-02-12	Day 4	https://data.mendeley.com/datasets/vxbjdwyptc/draft?a=4b1b2495-356f-4183-a52f-98049db2de1c
2019-02-22	Day 5	https://data.mendeley.com/datasets/bd2zfpwbjr/draft?a=a0d70e8b-8e07-4e07-872f-c47ce338b597
2019-02-26	Day 6	https://data.mendeley.com/datasets/5pmkc6mzg3/draft?a=1366d5ec-92ca-4edf-9784-2ee79c696a49
2019-02-27	Day 7	https://data.mendeley.com/datasets/zxsmdzw6kw/draft?a=7f6f7100-0764-45bd-b697-de1c591ce8a6
2019-02-28	Day 8	https://data.mendeley.com/datasets/x8v783y5gz/draft?a=a32a9b48-b431-400c-b21c-e9ae12000f3e
2019-03-04	Day 9	https://data.mendeley.com/datasets/k5r6ftvf2m/draft?a=f2f9cbff-cd26-4ad0-9be7-4be6732f57ad
2019-03-05	Day 10	https://data.mendeley.com/datasets/6jbcxpjzbv/draft?a=4285592a-2868-4e4e-85c0-2de884ffb5ac
	Control_experiment	https://data.mendeley.com/datasets/3w7bpxccgj/draft?a=d9ac59e4-5b4e-470d-9bd2-00f0919ffc48
